# Supplementary material for: Study of a novel supramolecular hydrogel electrolyte for aqueous zinc ion batteries
Source: Royal Society of Chemistry journal article supplement (doi:10.1039/d3tc01284k), 2023-01-01
Supplement: d3tc01284k1.pdf [file d3tc01284k1.pdf]

## Study of a novel supramolecular hydrogel electrolyte for aqueous zinc ion batteries

Ying Yang,<sup>a</sup> Changmiao Huang,<sup>a</sup> Hui Li,<sup>a</sup> Zixuan Teng,<sup>a</sup> Heng Zhang,<sup>a</sup> Xi Wei,<sup>a</sup> Hong Zhang,<sup>a</sup> Lili Wu,<sup>a</sup> Chaocan Zhang,<sup>a</sup> Wanyu Chen <sup>\*a</sup>

<sup>a</sup> School of Materials Science and Engineering, Wuhan University of Technology, Wuhan, 430070, China

\* Corresponding author

Email: chenwanyu@whut.edu.cn

### Supporting Figure

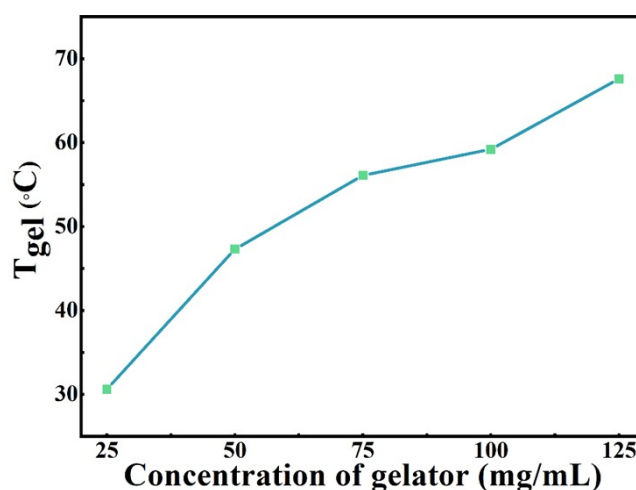

Figure S1 Phase transition temperature with different concentrations of gelator.

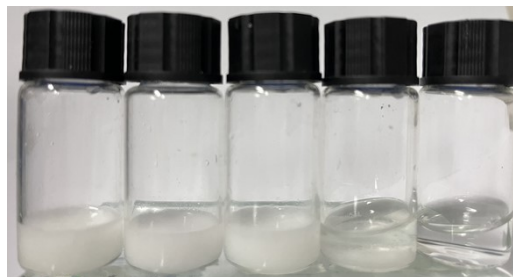

Figure S2. The gelation of different DMSO content solutions. The DMSO content was 10 %, 20 %, 30 %, 40 % and 50 % from left to right, respectively.

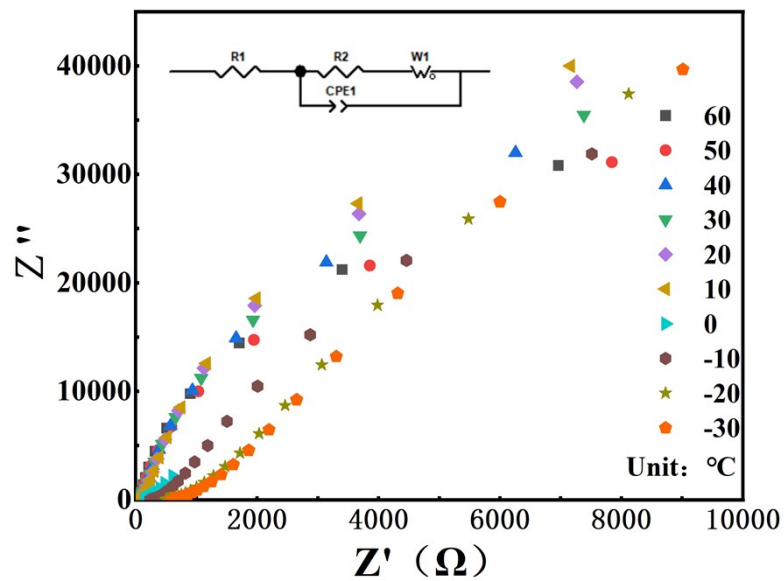

Figure S3. Electrochemical impedance plots of SBU-D20 at different temperature.

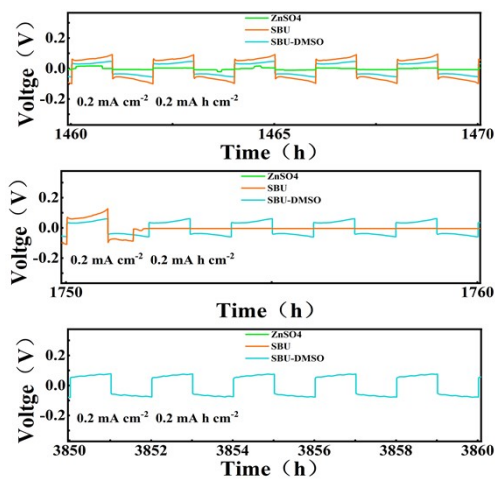

Figure S4. Voltage profiles of Zn/ Zn symmetrical batteries with different electrolyte at the current density of  $0.2 \text{ mA cm}^{-2}$ .

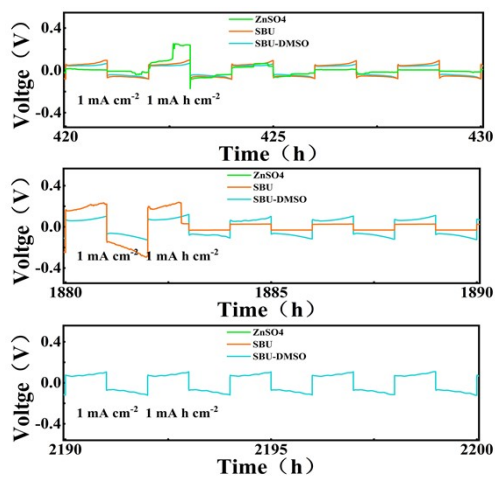

Figure S5. Voltage profiles of Zn/ Zn symmetrical batteries with different electrolyte at the

current density of  $1 \text{ mA cm}^{-2}$ .

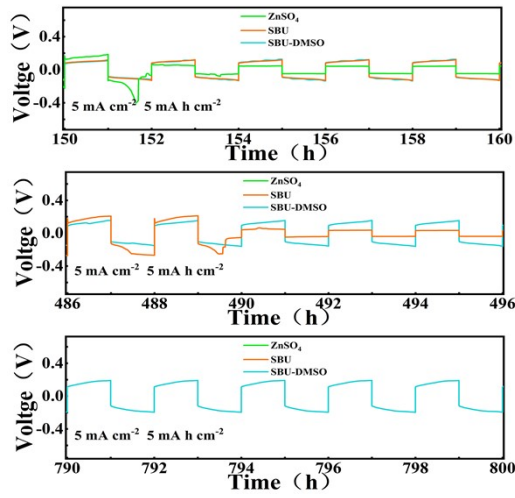

**Figure S6.** Voltage profiles of Zn/ Zn symmetrical batteries with different electrolyte at the current density of  $5 \text{ mA cm}^{-2}$ .

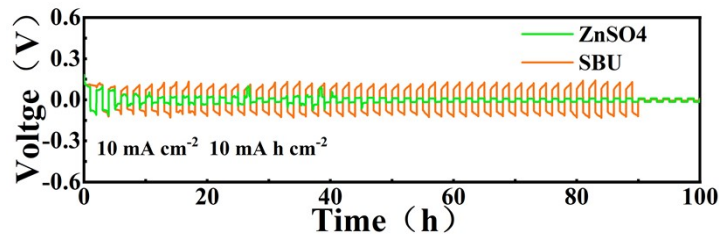

**Figure S7.** Galvanostatic Zn plating/stripping in Zn/Zn symmetrical batteries with  $10 \text{ mA} \cdot \text{cm}^{-2}$ ,  $10 \text{ mA h cm}^{-2}$

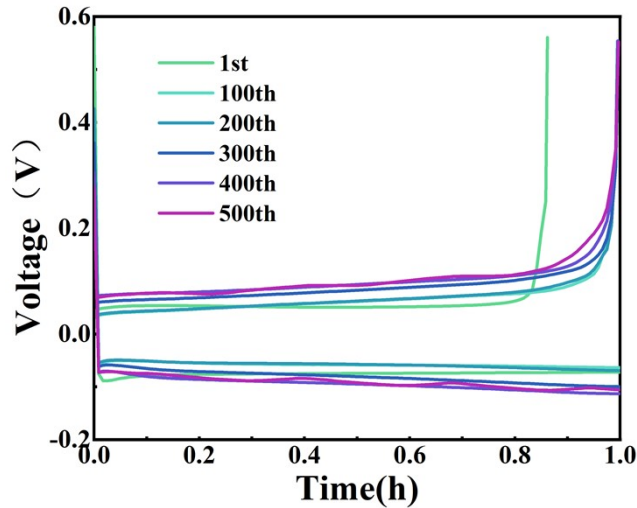

**Figure S8.** Voltage profiles of Zn/Cu batteries with SBU-DMSO electrolyte.

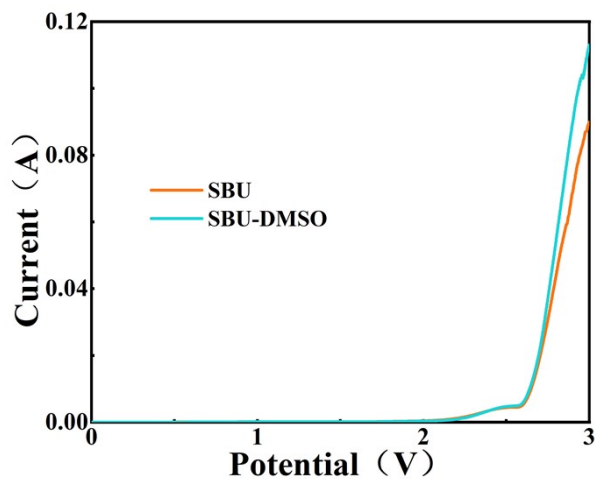

Figure S9. LSV curve of SBU and SBU-DMSO

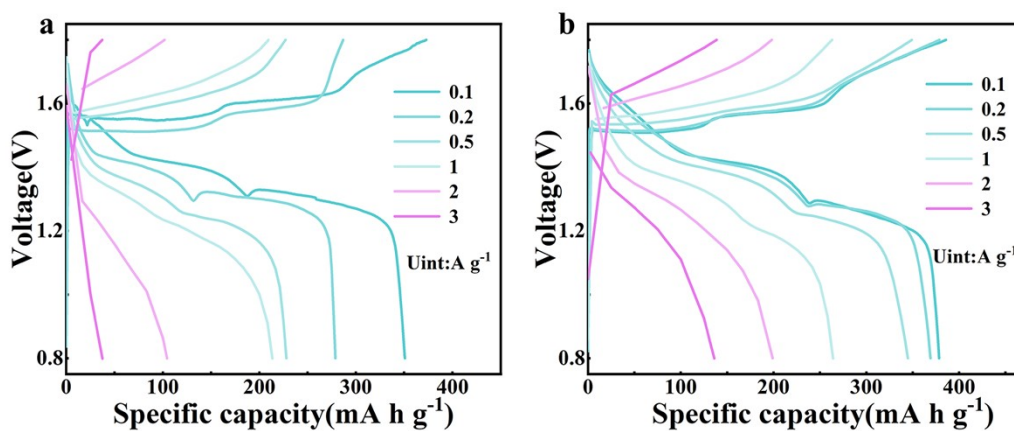

Figure S10. GCD curves of  $\beta$  MnO<sub>2</sub>/Zn full cell at different current densities, (a) with ZnSO<sub>4</sub> LE, (b) with SBU electrolyte.

## Supporting Table

**Table S1.** The cycle life of Zn/ Zn-symmetric batteries with different electrolytes.

| <u>Electrolyte</u>                                           | Density/Capacity<br>(mA cm <sup>-2</sup> /mA h cm <sup>-2</sup> ) | Lifespan(hours) | <u>references</u> |
|--------------------------------------------------------------|-------------------------------------------------------------------|-----------------|-------------------|
| ZnSO <sub>4</sub> /SBU/DMSO                                  | 5/5                                                               | 800             | This work         |
|                                                              | 1/1                                                               | 2300            |                   |
|                                                              | 0.2/0.2                                                           | 4000            |                   |
| ZnSO <sub>4</sub> /DMSO                                      | 1/1                                                               | 2100            | 1                 |
|                                                              | 3/3                                                               | 200             |                   |
| ZnSO <sub>4</sub> / cyclodextrin                             | 5/5                                                               | 200             | 2                 |
|                                                              | 1/1                                                               | 1000            |                   |
| ZnSO <sub>4</sub> /vanillin                                  | 1/10                                                              | 200             | 3                 |
|                                                              | 1/5                                                               | 350             |                   |
|                                                              | 1/1                                                               | 1000            |                   |
| ZnSO <sub>4</sub> /CMC/PAM hydrogel                          | 0.2/0.2                                                           | 500             | 4                 |
| ZnSO <sub>4</sub> /iota carrageenan (IC)<br>and Aam hydrogel | 0.25/0.25                                                         | 400             | 5                 |
| ZnSO <sub>4</sub> / alginate hydrogel                        | 2/2                                                               | 600             | 6                 |
|                                                              | 1/0.5                                                             | 1000            |                   |
| ZnSO <sub>4</sub> / PEG/ agarose                             | 5/1                                                               | 300             | 7                 |

## Reference

- 1 D. Feng, F. Cao, L. Hou, T. Li, Y. Jiao and P. Wu, *Small*, 2021, **17**, 2103195.
- 2 K. Zhao, G. Fan, J. Liu, F. Liu, J. Li, X. Zhou, Y. Ni, M. Yu, Y.-M. Zhang, H. Su, Q. Liu and F. Cheng, *J. Am. Chem. Soc.*, 2022, jacs.2c00551.
- 3 B. Wang, J. Li, C. Hou, Q. Zhang, Y. Li and H. Wang, *ACS Appl. Mater. Interfaces*, 2020, **12**, 46005–46014.
- 4 Y. Mao, H. Ren, J. Zhang, T. Luo, N. Liu, B. Wang, S. Le and N. Zhang, *Electrochim. Acta*, 2021, **393**, 139094.
- 5 C. Y. Chan, Z. Wang, Y. Li, H. Yu, B. Fei and J. H. Xin, *ACS Appl. Mater. Interfaces*, 2021, **13**, 30594–30602.
- 6 W. Shang, J. Zhu, Y. Liu, L. Kang, S. Liu, B. Huang, J. Song, X. Li, F. Jiang, W. Du, Y. Gao and H. Luo, *ACS Appl. Mater. Interfaces*, 2021, **13**, 24756–24764.
- 7 Y. Meng, L. Zhang, M. Peng, D. Shen, C. Zhu, S. Qian, J. Liu, Y. Cao, C. Yan, J. Zhou and T. Qian, *Adv. Funct. Mater.*, 2022, 2206653.
